# Supplementary material
Source: publisher figshare collection journal article supplement (https://gsajournals.figshare.com/ndownloader/files/24740711)
Supplement: Supplementary file 1 [file 24740711]

**Table S6** Summary of mutation rate estimates retrieved from the literature

| **Species** | **Mutation rate (per bp. per gen.)** | **Taxonomic group** |
| --- | --- | --- |
| Chlamydomonas reinhardtii | 3.80E-10 | Green Algae |
| Ostreococcus tauri | 4.79E-10 | Green Algae |
| Ostreococcus mediterraneus | 5.92E-10 | Green Algae |
| Bathycoccus prasinos | 4.39E-10 | Green Algae |
| Micromonas pusilla | 9.76E-10 | Green Algae |
| Apis mellifera | 3.4E-09 | Animals |
| Caenorhabditis briggsae | 1.33E-09 | Animals |
| Caenorhabditis elegans | 1.45E-09 | Animals |
| Daphnia pulex | 5.69E-09 | Animals |
| Drosophila melanogaster | 5.17E-09 | Animals |
| Heliconius melpomene | 2.90E-09 | Animals |
| Homo sapiens | 1.35E-08 | Animals |
| Mus musculus | 5.40E-09 | Animals |
| Pan troglodytes | 1.20E-08 | Animals |
| Pristionchus pacificus | 2.00E-09 | Animals |
| Clupea harengus | 2.00E-09 | Animals |
| Chironomus riparius | 2.1E-09 | Animals |
| Ficedula albicollis | 4.6E-09 | Animals |
| Bombus terrestris | 3.6E-09 | Animals |
| Arabidopsis thaliana | 6.95E-09 | Multicellular plants |
| Oryza sativa | 7.10E-09 | Multicellular plants |
| Spirodela polyrhiza | 8.39E-11 | Multicellular plants |
| Silene latifolia | 7.31E-09 | Multicellular plants |
| Lemna minor | 8.66E-11 | Multicellular plants |
| Prunus persica | 7.77E-09 | Multicellular plants |
| Picea sitchensis | 2.7E-08 | Multicellular plants |
| Eucalyptus melliodora | 6.19E-08 | Multicellular plants |
| Neurospora crassa | 4.10E-09 | Other unicellular eukaryotes |
| Paramecium tetraurelia | 1.94E-11 | Other unicellular eukaryotes |
| Plasmodium falciparum | 2.08E-09 | Other unicellular eukaryotes |
| Saccharomyces cerevisiae | 2.63E-10 | Other unicellular eukaryotes |
| Schizosaccharomyces pombe | 2.17E-10 | Other unicellular eukaryotes |
| Trypanosoma brucei | 1.38E-09 | Other unicellular eukaryotes |
| Phaeodactylum tricornutum | 4.77E-10 | Other unicellular eukaryotes |
